# Supplementary material for: Deep trap engineering in Gd3GaO6:Bi3+ persistent phosphors through co-doping lanthanide ions
Source: Royal Society of Chemistry journal article supplement (doi:10.1039/d4tc01792g), 2024-01-01
Supplement: d4tc01792g1.pdf [file d4tc01792g1.pdf]

**Deep trap engineering in  $\text{Gd}_3\text{GaO}_6:\text{Bi}^{3+}$  persistent phosphors through co-doping lanthanide ions**

Chengxue Du<sup>a</sup>, Dangli Gao<sup>\*ab</sup>, Xiaochun Hou<sup>a</sup>, Xiangyu Zhang<sup>c</sup>, Qing Pang<sup>b</sup> and Sining Yun<sup>d</sup>

<sup>a</sup> School of Environmental and Municipal Engineering, Xi'an University of Architecture and Technology, Xi'an, Shaanxi 710055, China

<sup>b</sup> College of Science, Xi'an University of Architecture and Technology, Xi'an 710055, China. E-mail: gaodangli@163.com, gaodangli@xauat.edu.cn

<sup>c</sup> College of Science, Chang'an University, Xi'an, Shaanxi 710064, China

<sup>d</sup> Functional Materials Laboratory (FML), School of Materials Science & Engineering, Xi'an University of Architecture and Technology, Xi'an, Shaanxi 710055, China

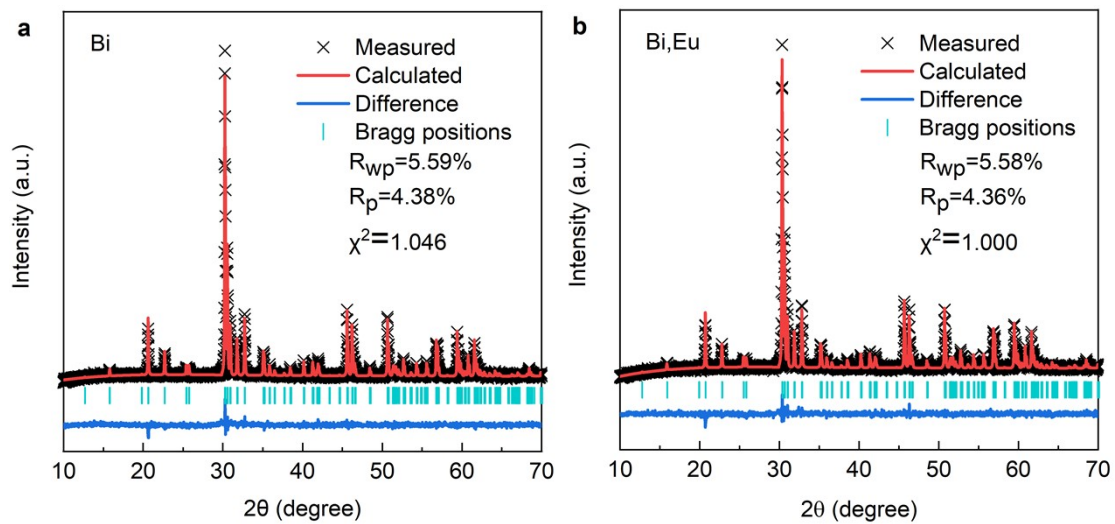

Fig. S1. The Rietveld refinement of pure GGO:Bi and GGO:Bi,Eu.

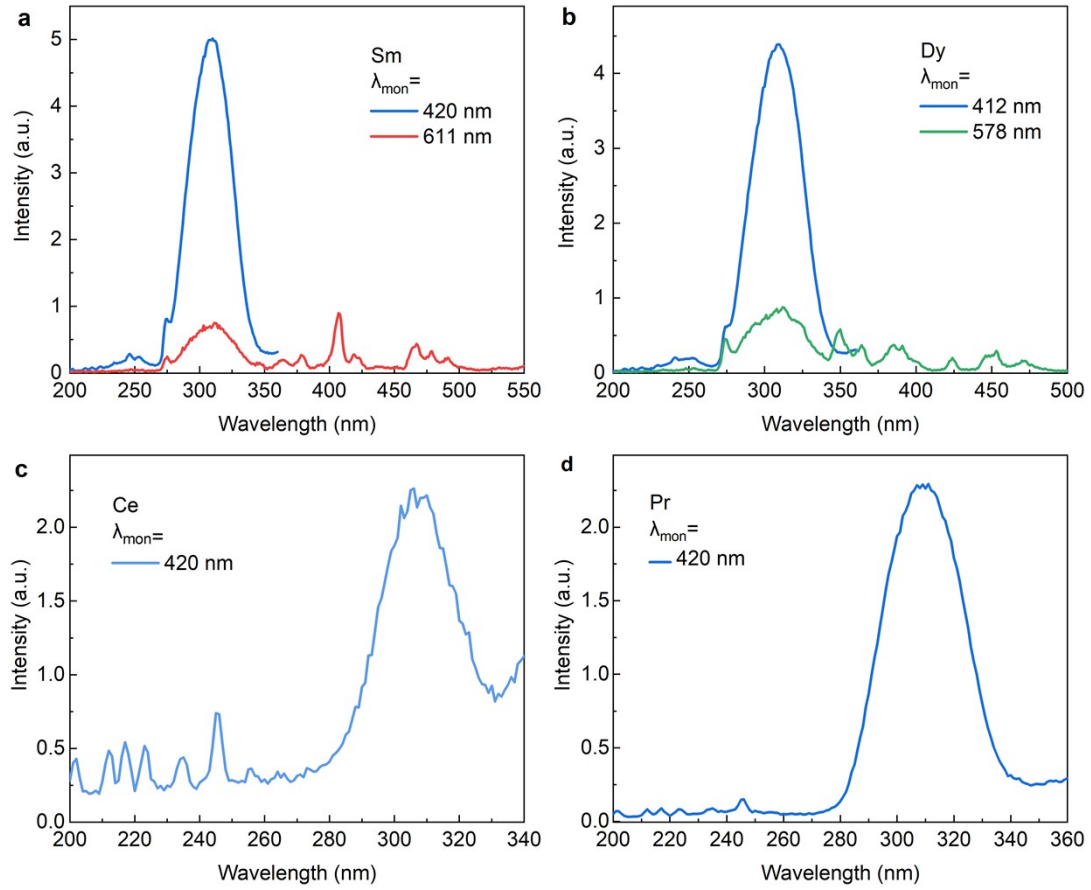

Fig. S2. PLE spectra of GGO:Bi,Ln<sup>3+</sup> (Ln=Sm, Dy, Ce and Pr). (a) GGO:Bi,Sm<sup>3+</sup>; (b) GGO:Bi,Dy<sup>3+</sup>; (c) GGO:Bi,Ce<sup>3+</sup> and (d) GGO:Bi,Pr<sup>3+</sup>.

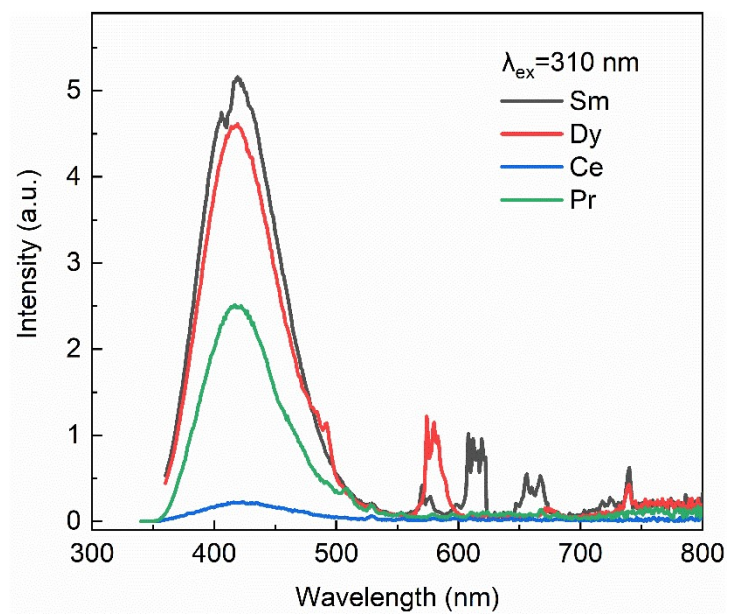

Fig. S3. PL spectra of GGO:Bi,Ln<sup>3+</sup> (Ln=Sm, Dy, Ce and Pr).

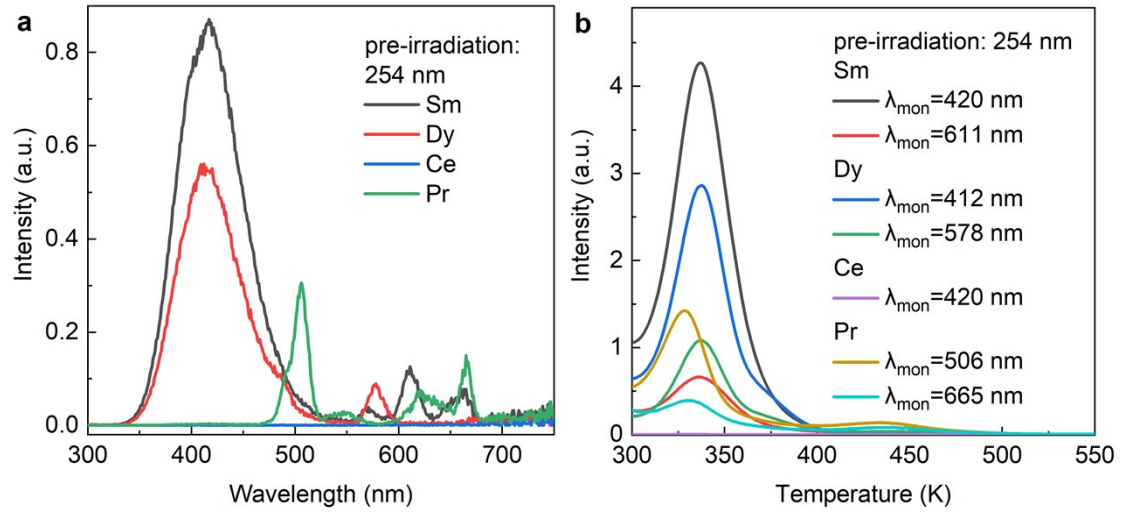

Fig. S4. PersL and TL spectra of GGO:Bi, Ln<sup>3+</sup> (Ln=Sm, Dy, Ce and Pr). (a,b) PersL spectra and TL curves. Before the measurement of PersL and PSL, the samples have been pre-irradiated for 3 min.

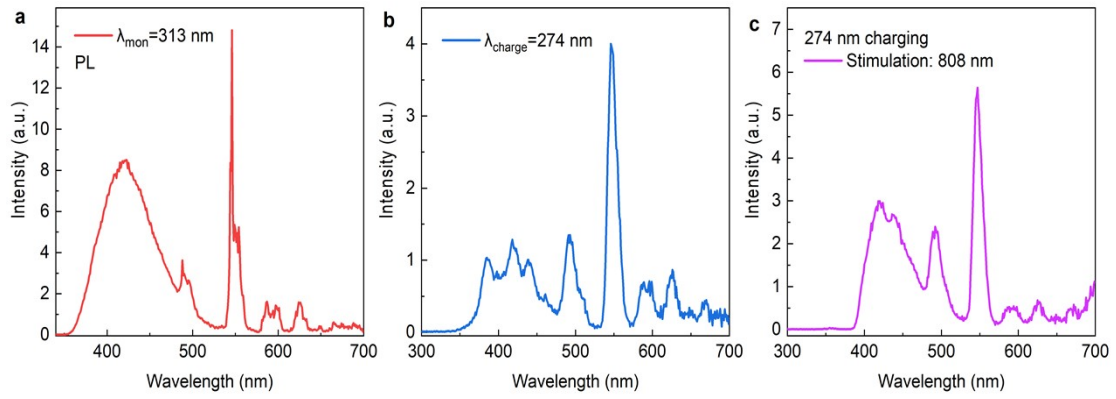

Fig. S5. Comparison of PL, PersL and PSL emission spectra in GGO:Bi,Tb<sup>3+</sup>. (a) PL spectrum; (b) PersL spectrum and (c) PSL spectra. Before the measurement of PersL and PSL, the sample has been pre-irradiated for 3 min.
